# Supplementary material for: Preparation of ordered mesoporous carbon material based on poly-dopamine and its application in selective enrichment ofN-linked glycans
Source: Royal Society of Chemistry journal article supplement (doi:10.1039/c7ay02800h), 2018-01-01
Supplement: c7ay02800h1.pdf [file c7ay02800h1.pdf]

## Supplementary material

### Preparation of dopamine based ordered mesoporous carbon material and its selective enrichment of N-linked glycans

Yameng Zhao,<sup>a</sup> Yangyang Gan<sup>a</sup>, Lingyi Zhang<sup>a\*</sup>, Zhanying Chu<sup>a</sup>, Fan Liu<sup>b</sup>, Weibing Zhang<sup>a\*</sup>

<sup>a</sup>Shanghai Key Laboratory of Functional Materials Chemistry, School of Chemistry and Molecular Engineering, East China University of Science and Technology, Shanghai 200237, (P. R. China)

<sup>b</sup>Center of Analysis and Testing, Nanchang University, Nanchang, Jiangxi 330047, (P. R. China)

\* E-mail: zhanglingyi@ecust.edu.cn. Tel: 86-21-64252145 Fax: +86-021-64233161;

weibingzhang@ecust.edu.cn

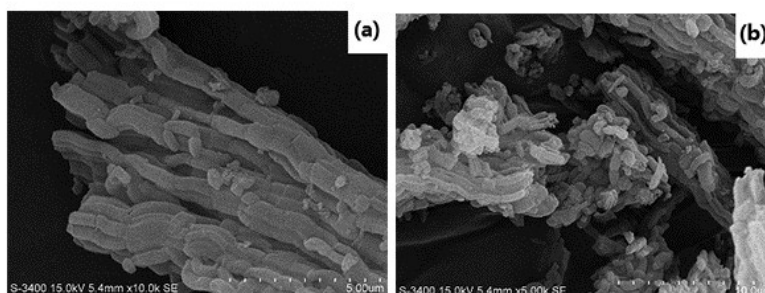

Figure S1. SEM images of SBA-15

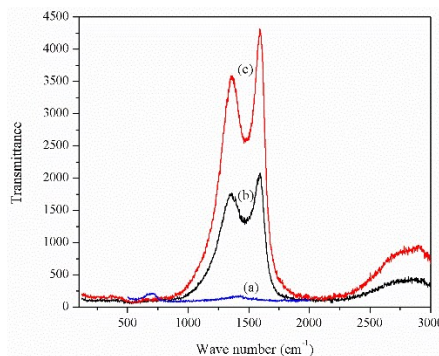

Figure S2. The Raman spectra of (a) SBA-15, (b) SBA-15/DPA, (c) MSC.

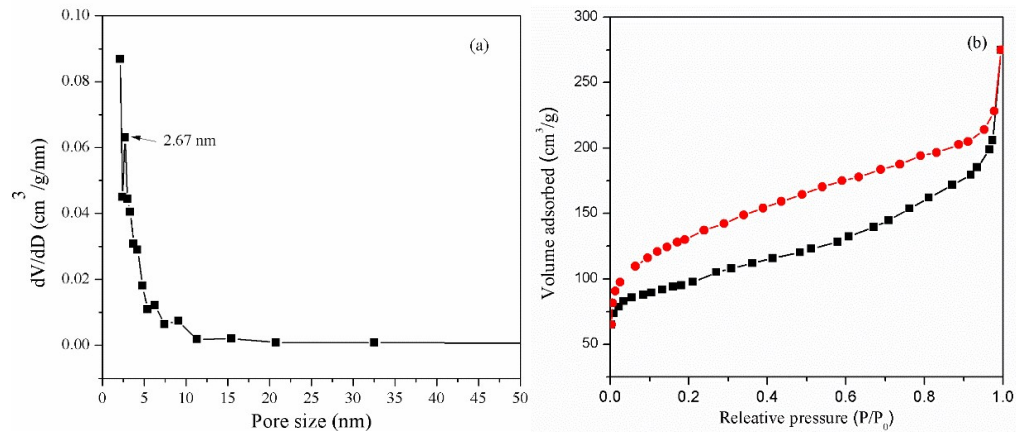

Figure S3. (a) The pore size distribution of the as-prepared MSC material; (b)  $\text{N}_2$  adsorption-desorption isotherm measured at 77 K

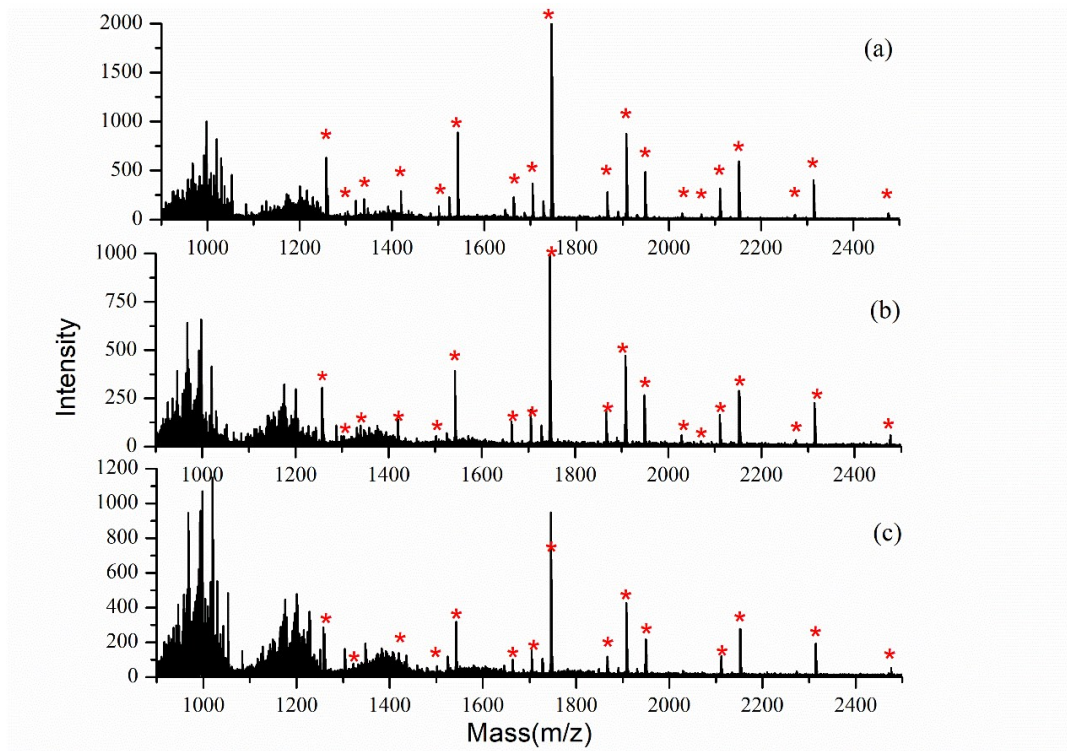

Figure S4. MALDI-TOF MS analysis of N-linked glycans after enrichment by active carbon from OVA digests containing BSA and OVA with different ratios (w/w). The ratio of OVA digests: OVA: BSA are 1: 0: 0 (a), 1: 50: 50 (b) and 1: 100: 100 (c), respectively. The symbol "\*" in mass spectra denotes glycans released from ovalbumin

Table S1. The detailed information of N-linked glycan from human serum by MSC material

|                     |                                                                                     |                                                                                     |                                                                                     |                                                                                     |                                                                                      |                                                                                       |                                                                                       |                                                                                       |
|---------------------|-------------------------------------------------------------------------------------|-------------------------------------------------------------------------------------|-------------------------------------------------------------------------------------|-------------------------------------------------------------------------------------|--------------------------------------------------------------------------------------|---------------------------------------------------------------------------------------|---------------------------------------------------------------------------------------|---------------------------------------------------------------------------------------|
| N-linked<br>glycans | 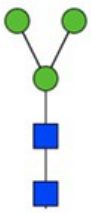   |    |    |    |    |    |    |    |
| No.                 | 1                                                                                   | 2                                                                                   | 3                                                                                   | 4                                                                                   | 5                                                                                    | 6                                                                                     | 7                                                                                     | 8                                                                                     |
| m/z                 | 933.3                                                                               | 1079.4                                                                              | 1136.3                                                                              | 1257.1                                                                              | 1282.2                                                                               | 1298.2                                                                                | 1339.2                                                                                | 1419.2                                                                                |
| Compositi<br>on     | H3N2                                                                                | H3N2F                                                                               | H3N3                                                                                | H5N2                                                                                | H3N3F1                                                                               | H4N3                                                                                  | H2N4                                                                                  | H6N2                                                                                  |
| N-linked<br>glycans |   |   |   |   |   |   |   |   |
| No.                 | 9                                                                                   | 10                                                                                  | 11                                                                                  | 12                                                                                  | 13                                                                                   | 14                                                                                    | 15                                                                                    | 16                                                                                    |
| m/z                 | 1444.2                                                                              | 1460.2                                                                              | 1485.2                                                                              | 1501.2                                                                              | 1581.2                                                                               | 1622.9                                                                                | 1647.2                                                                                | 1663.2                                                                                |
| Compositi<br>on     | H4N3<br>F1                                                                          | H5N3                                                                                | H3N4<br>F1                                                                          | H4N4                                                                                | H7N2                                                                                 | H6N3                                                                                  | H4N4<br>F1                                                                            | H5N4                                                                                  |
| N-linked<br>glycans |  |  |  |  |  |  |  |  |
| No.                 | 17                                                                                  | 18                                                                                  | 19                                                                                  | 20                                                                                  | 21                                                                                   | 22                                                                                    | 23                                                                                    | 24                                                                                    |
| m/z                 | 1688.3                                                                              | 1704.2                                                                              | 1743.2                                                                              | 1792.9                                                                              | 1809.3                                                                               | 1825.2                                                                                | 1850.3                                                                                | 1866.3                                                                                |
| Composio<br>n       | H3N5<br>F1                                                                          | H4N5                                                                                | H8N2                                                                                | H4N4<br>A1                                                                          | H5N4F1                                                                               | H6N4                                                                                  | H4N5<br>F1                                                                            | H5N5                                                                                  |

|                  |        |        |        |        |          |        |
|------------------|--------|--------|--------|--------|----------|--------|
| N-linked glycans |        |        |        |        |          |        |
| No.              | 25     | 26     | 27     | 28     | 29       | 30     |
| m/z              | 1905.9 | 1976.3 | 2012.6 | 2028.3 | 2122.3   | 2174.3 |
| Composition      | H9N2   | H5N4A1 | H5N5F1 | H6N5   | H5N4F1A1 | H6N5F1 |

(N-linked glycans were released by PNGase F and glycan structures were searched from Glyco Workbench. Symbols in composition: H=Hexose; N=N-Acetyl hexosamine; F=Fucose; A=N-Acetylneuramic Acid. ●, Mannose; ●, Galactose; ■, GlcNAc; ◆, Sialic Acid; ▲, Fucose, ○, Mannose or Galactose. )
